# Supplementary material for: Explainable Artificial Intelligence Paves the Way in Precision Diagnostics and Biomarker Discovery for the Subclass of Diabetic Retinopathy in Type 2 Diabetics
Source: MDPI journal article supplement (doi:10.3390/metabo13121204), 2023-12-18
Supplement: s1 [file s1]

**Table S1.** Statistical results for clinical and biochemical features

| Clinical and biochemical feature | DR Subclass**  |                |               | <i>p</i> -value |
|----------------------------------|----------------|----------------|---------------|-----------------|
|                                  | NDR            | NPDR           | PDR           |                 |
| Age                              | 55a (14)       | 63b (16.75)    | 62b (17)      | <0.001          |
| Height                           | 164 (12)       | 163 (13)       | 163 (11)      | 0.425           |
| Weight                           | 66.5 (13)      | 65.9 (12)      | 64 (10.45)    | 0.640           |
| BMI                              | 23.828 (3.989) | 24.49 (3.906)  | 24.69 (3.926) | 0.709           |
| HBA1C                            | 6.8a (1.7)     | 7.7b (2.8)     | 8.1b (2.9)    | <0.001          |
| Glucose                          | 130a (53)      | 153b (89)      | 153ab (104)   | 0.005           |
| Creatinine                       | 78.45a (29.15) | 81.9a (36.875) | 92.9b (72.75) | <0.001          |

\*: Features are summarized as 'median (interquartile range)'; #: Kruskal-Wallis H test; \*\*: There is a statistically significant difference in the group categories that do not contain the same letter; NDR: non- diabetic retinopathy; NPDR: non-proliferative diabetic retinopathy; PDR: proliferative diabetic retinopathy.

**Table S2.** Statistical results for metabolits levels

| Metabolites name * | DR Subclass**               |                            |                            | p-value#         |
|--------------------|-----------------------------|----------------------------|----------------------------|------------------|
|                    | NDR                         | NPDR                       | PDR                        |                  |
| Cr                 | 0.955 <sub>a</sub> (0.237)  | 1.05 <sub>b</sub> (0.348)  | 1.145 <sub>c</sub> (0.732) | <b>&lt;0.001</b> |
| C0                 | 44.886 (11.642)             | 45.153 (12.333)            | 43.349 (11.806)            | 0.456            |
| C12                | 0.09 (0.055)                | 0.079 (0.043)              | 0.081 (0.048)              | 0.056            |
| C14.1              | 0.1 <sub>a</sub> (0.044)    | 0.087 <sub>b</sub> (0.04)  | 0.084 <sub>b</sub> (0.045) | <b>0.003</b>     |
| C14.2              | 0.033 (0.025)               | 0.031 (0.022)              | 0.03 (0.026)               | 0.077            |
| C16                | 0.123 <sub>a</sub> (0.046)  | 0.107 <sub>b</sub> (0.037) | 0.096 <sub>b</sub> (0.04)  | <b>&lt;0.001</b> |
| C18                | 0.038 <sub>a</sub> (0.014)  | 0.034 <sub>b</sub> (0.013) | 0.03 <sub>b</sub> (0.012)  | <b>&lt;0.001</b> |
| C18.1              | 0.118 <sub>a</sub> (0.054)  | 0.114 <sub>b</sub> (0.05)  | 0.103 <sub>b</sub> (0.046) | <b>0.001</b>     |
| C18.2              | 0.079 <sub>a</sub> (0.036)  | 0.069 <sub>b</sub> (0.03)  | 0.061 <sub>b</sub> (0.031) | <b>&lt;0.001</b> |
| C2                 | 6.762 (2.618)               | 6.61 (3.447)               | 7.805 (4.33)               | 0.366            |
| C3                 | 0.458 <sub>a</sub> (0.188)  | 0.484 <sub>a</sub> (0.229) | 0.576 <sub>b</sub> (0.318) | <b>0.002</b>     |
| C4                 | 0.181 <sub>a</sub> (0.075)  | 0.198 <sub>b</sub> (0.084) | 0.267 <sub>c</sub> (0.148) | <b>&lt;0.001</b> |
| C5                 | 0.115 <sub>a</sub> (0.055)  | 0.119 <sub>a</sub> (0.053) | 0.152 <sub>b</sub> (0.071) | <b>0.001</b>     |
| C7.Dc              | 0.037 (0.025)               | 0.034 (0.02)               | 0.035 (0.027)              | 0.460            |
| C8                 | 0.154 (0.087)               | 0.143 (0.078)              | 0.143 (0.099)              | 0.314            |
| Ala                | 539.5 (162.25)              | 549 (150.25)               | 563 (178.5)                | 0.238            |
| Arg                | 108.5 (32.05)               | 102 (33.075)               | 110 (29.75)                | 0.487            |
| Asn                | 59.6 (13.1)                 | 56.5 (17.7)                | 58.6 (17.15)               | 0.125            |
| Asp                | 19.65 (17.125)              | 20.05 (16.8)               | 20.6 (15.95)               | 0.735            |
| Cit                | 29.55 <sub>ab</sub> (12.95) | 26.95 <sub>a</sub> (16.15) | 33.1 <sub>b</sub> (31.05)  | <b>0.018</b>     |
| Gln                | 608.5 (125.25)              | 610 (142.25)               | 608 (99.5)                 | 0.760            |
| Glu                | 79.9 (57.525)               | 88.5 (55.35)               | 80.4 (54)                  | 0.594            |
| Gly                | 250 (73.25)                 | 265.5 (100.5)              | 273 (66.5)                 | 0.070            |
| His                | 92.45 <sub>a</sub> (14.175) | 86.6 <sub>b</sub> (14.775) | 87.1 <sub>ab</sub> (16.55) | <b>0.002</b>     |
| Ile                | 98.8 (28.525)               | 95 (29.95)                 | 98.4 (30.05)               | 0.714            |
| Leu                | 194 <sub>a</sub> (44.5)     | 173 <sub>b</sub> (50.5)    | 181 <sub>ab</sub> (55)     | <b>0.011</b>     |
| Lys                | 226 <sub>a</sub> (45.75)    | 206.5 <sub>b</sub> (42.5)  | 207 <sub>b</sub> (48.5)    | <b>&lt;0.001</b> |
| Met                | 25.85 <sub>a</sub> (7.25)   | 22.9 <sub>b</sub> (6)      | 23.7 <sub>b</sub> (6.6)    | <b>&lt;0.001</b> |
| Orn                | 83.55 (32.975)              | 77.9 (39.125)              | 77.3 (38.25)               | 0.173            |

|                |                    |                   |                    |                  |
|----------------|--------------------|-------------------|--------------------|------------------|
| Phe            | 80.75a (16.2)      | 72.8b (17.85)     | 76.4ab (18.75)     | <b>0.017</b>     |
| Pro            | 180.5a (72.5)      | 198b (70.5)       | 195b (90.5)        | <b>0.018</b>     |
| Ser            | 145a (41.25)       | 139a (40)         | 131b (40.5)        | <b>0.001</b>     |
| Thr            | 144a (36.25)       | 133.5b (51.5)     | 133b (56.7)        | <b>0.023</b>     |
| Trp            | 64.5a (16.775)     | 54.35b (17.625)   | 51.8b (15.65)      | <b>&lt;0.001</b> |
| Tyr            | 72.3a (20.1)       | 61.9b (20.6)      | 58.4b (14.4)       | <b>&lt;0.001</b> |
| Val            | 244 (52)           | 231 (48.5)        | 235 (54.5)         | 0.101            |
| Adma           | 0.515a (0.14)      | 0.54b (0.139)     | 0.581b (0.193)     | <b>0.008</b>     |
| Kynurenine     | 2.06a (0.852)      | 2.225ab (0.987)   | 2.49b (1.41)       | <b>0.004</b>     |
| Putrescine     | 0.148 (0.064)      | 0.147 (0.062)     | 0.15 (0.072)       | 0.994            |
| Sarcosine      | 3.37 (1.19)        | 3.285 (1.342)     | 3.54 (1.43)        | 0.563            |
| Serotonin      | 0.653 (0.437)      | 0.653 (0.409)     | 0.728 (0.515)      | 0.678            |
| Spermidine     | 0.244 (0.123)      | 0.23 (0.117)      | 0.222 (0.085)      | 0.064            |
| Taurine        | 144.5 (65.25)      | 133.5 (66.5)      | 132 (52.5)         | 0.432            |
| Total.Dma      | 0.794a (0.276)     | 0.917b (0.399)    | 1.08c (0.659)      | <b>&lt;0.001</b> |
| Lysopc.A.C14.0 | 3.009 (0.715)      | 2.827 (0.774)     | 2.929 (0.814)      | 0.069            |
| Lysopc.A.C16.0 | 109.479a (31.835)  | 96.572b (37.849)  | 102.163b (27.554)  | <b>&lt;0.001</b> |
| Lysopc.A.C16.1 | 2.947 (0.994)      | 2.667 (1.516)     | 2.657 (0.963)      | 0.083            |
| Lysopc.A.C17.0 | 1.296 (0.502)      | 1.409 (0.604)     | 1.439 (0.643)      | 0.282            |
| Lysopc.A.C18.0 | 25.754a (8.908)    | 22.568b (10.234)  | 22.413b (7.293)    | <b>&lt;0.001</b> |
| Lysopc.A.C18.1 | 15.242 (4.922)     | 14.137 (7.259)    | 13.701 (5.411)     | 0.058            |
| Lysopc.A.C18.2 | 25.15a (11.551)    | 22.288b (10.739)  | 21.014b (9.948)    | <b>&lt;0.001</b> |
| Lysopc.A.C20.3 | 1.61a (0.78)       | 1.468ab (0.727)   | 1.337b (0.599)     | <b>0.011</b>     |
| Lysopc.A.C20.4 | 4.703 (2.12)       | 4.343 (2.225)     | 4.305 (1.86)       | 0.194            |
| Pc.Aa.C26.0    | 0.502 (0.069)      | 0.506 (0.086)     | 0.501 (0.088)      | 0.798            |
| Pc.Aa.C28.1    | 1.983a (0.656)     | 1.761b (0.586)    | 1.8b (0.636)       | <b>&lt;0.001</b> |
| Pc.Aa.C30.0    | 3.031 (1.365)      | 2.777 (1.44)      | 2.751 (1.446)      | 0.088            |
| Pc.Aa.C32.0    | 13.62a (3.843)     | 12.645b (4.453)   | 12.157b (3.906)    | <b>0.003</b>     |
| Pc.Aa.C32.1    | 17.695 (13.514)    | 15.837 (13.444)   | 16.132 (13.147)    | 0.125            |
| Pc.Aa.C32.2    | 3.491a (1.542)     | 2.786b (1.499)    | 2.514b (1.818)     | <b>&lt;0.001</b> |
| Pc.Aa.C32.3    | 0.393a (0.159)     | 0.339b (0.111)    | 0.358b (0.149)     | <b>&lt;0.001</b> |
| Pc.Aa.C34.1    | 196.364a (79.173)  | 177.856b (81.117) | 181.965ab (72.976) | <b>0.043</b>     |
| Pc.Aa.C34.2    | 356.156a (112.844) | 311.615b (96.997) | 313.591b (90.195)  | <b>&lt;0.001</b> |
| Pc.Aa.C34.3    | 16.777a (7.506)    | 14.876b (8.5)     | 14.744b (6.987)    | <b>0.007</b>     |
| Pc.Aa.C34.4    | 1.686a (0.813)     | 1.396b (0.591)    | 1.41b (0.619)      | <b>&lt;0.001</b> |

|             |                   |                   |                   |                  |
|-------------|-------------------|-------------------|-------------------|------------------|
| Pc.Aa.C36.0 | 2.635a (1.178)    | 2.126b (1.027)    | 2.035ab (1.485)   | <b>&lt;0.001</b> |
| Pc.Aa.C36.1 | 41.772a (14.027)  | 35.605b (16.816)  | 34.425b (10.599)  | <b>&lt;0.001</b> |
| Pc.Aa.C36.2 | 187.317a (58.491) | 156.514b (68.897) | 161.227b (64.643) | <b>&lt;0.001</b> |
| Pc.Aa.C36.3 | 104.835a (33.752) | 91.268b (34.6)    | 91.59b (33.826)   | <b>0.002</b>     |
| Pc.Aa.C36.4 | 158.82 (56.087)   | 144.582 (62.087)  | 147.026 (41.322)  | 0.072            |
| Pc.Aa.C36.5 | 44.86 (30.672)    | 42.908 (24.526)   | 40.197 (27.18)    | 0.371            |
| Pc.Aa.C36.6 | 1.391a (0.703)    | 1.213b (0.537)    | 1.323b (0.697)    | <b>0.002</b>     |
| Pc.Aa.C38.0 | 3.43a (1.429)     | 2.799b (1.186)    | 2.747b (1.58)     | <b>&lt;0.001</b> |
| Pc.Aa.C38.1 | 1.168 (0.592)     | 0.979 (0.62)      | 1.084 (0.53)      | 0.111            |
| Pc.Aa.C38.3 | 42.578a (14.038)  | 38.427b (13.163)  | 37.55b (12.193)   | <b>&lt;0.001</b> |
| Pc.Aa.C38.4 | 83.246 (31.618)   | 81.445 (32.231)   | 78.147 (20.492)   | 0.362            |
| Pc.Aa.C38.5 | 63.574 (23.443)   | 62.684 (21.827)   | 61.54 (22.971)    | 0.124            |
| Pc.Aa.C38.6 | 134.927a (56.142) | 112.334b (42.674) | 112.454b (51.515) | <b>&lt;0.001</b> |
| Pc.Aa.C40.1 | 0.432 (0.165)     | 0.408 (0.152)     | 0.392 (0.167)     | 0.160            |
| Pc.Aa.C40.2 | 0.332 (0.13)      | 0.306 (0.146)     | 0.283 (0.126)     | 0.078            |
| Pc.Aa.C40.3 | 0.561 (0.225)     | 0.543 (0.224)     | 0.529 (0.202)     | 0.230            |
| Pc.Aa.C40.4 | 2.812 (0.946)     | 2.803 (1.388)     | 2.754 (1.214)     | 0.182            |
| Pc.Aa.C40.5 | 13.878a (7.379)   | 12.473b (7.959)   | 11.732b (5.094)   | <b>0.015</b>     |
| Pc.Aa.C40.6 | 49.499a (20.844)  | 42.339b (17.201)  | 42.123b (18.191)  | <b>&lt;0.001</b> |
| Pc.Aa.C42.0 | 0.686 (0.327)     | 0.634 (0.286)     | 0.649 (0.287)     | 0.169            |
| Pc.Aa.C42.1 | 0.407a (0.187)    | 0.361b (0.132)    | 0.376ab (0.173)   | <b>0.006</b>     |
| Pc.Aa.C42.2 | 0.43a (0.168)     | 0.36b (0.136)     | 0.316b (0.189)    | <b>&lt;0.001</b> |
| Pc.Aa.C42.4 | 0.179 (0.062)     | 0.17 (0.061)      | 0.169 (0.045)     | <b>0.071</b>     |
| Pc.Aa.C42.5 | 0.475a (0.22)     | 0.442a (0.189)    | 0.371b (0.178)    | <b>0.002</b>     |
| Pc.Aa.C42.6 | 0.745a (0.266)    | 0.657b (0.251)    | 0.691ab (0.274)   | <b>0.035</b>     |
| Pc.Ae.C30.0 | 0.217 (0.092)     | 0.206 (0.07)      | 0.216 (0.097)     | 0.216            |
| Pc.Ae.C32.1 | 2.345a (0.698)    | 1.973b (0.686)    | 1.985b (0.719)    | <b>&lt;0.001</b> |
| Pc.Ae.C32.2 | 0.602a (0.247)    | 0.498b (0.181)    | 0.502b (0.234)    | <b>&lt;0.001</b> |
| Pc.Ae.C34.0 | 1.07a (0.392)     | 0.975b (0.349)    | 0.984ab (0.486)   | <b>0.012</b>     |
| Pc.Ae.C34.1 | 6.54a (1.58)      | 6.184b (1.764)    | 5.82b (2.063)     | <b>0.006</b>     |
| Pc.Ae.C34.2 | 7.989a (2.906)    | 6.245b (2.366)    | 6.355b (2.718)    | <b>&lt;0.001</b> |
| Pc.Ae.C34.3 | 6.02a (2.218)     | 5.002b (2.052)    | 5.089b (2.582)    | <b>&lt;0.001</b> |
| Pc.Ae.C36.0 | 0.945 (0.476)     | 0.893 (0.365)     | 0.898 (0.427)     | 0.059            |
| Pc.Ae.C36.1 | 5.465a (1.526)    | 5.183b (1.704)    | 5.352ab (1.875)   | <b>0.031</b>     |
| Pc.Ae.C36.2 | 9.217a (3.849)    | 8.018b (3.427)    | 8.719ab (3.237)   | <b>0.004</b>     |

|               |                  |                  |                 |                  |
|---------------|------------------|------------------|-----------------|------------------|
| Pc.Ae.C36.3   | 5.315a (1.78)    | 4.341b (1.604)   | 4.721b (1.754)  | <b>&lt;0.001</b> |
| Pc.Ae.C36.4   | 11.731a (3.799)  | 10.148b (4.011)  | 10.268b (3.676) | <b>&lt;0.001</b> |
| Pc.Ae.C36.5   | 9.681a (3.588)   | 8.462b (3.018)   | 8.405b (3.13)   | <b>&lt;0.001</b> |
| Pc.Ae.C38.0   | 2.566a (1.167)   | 2.344b (0.797)   | 2.346b (1.027)  | <b>0.009</b>     |
| Pc.Ae.C38.1   | 0.709a (0.332)   | 0.6b (0.308)     | 0.647ab (0.384) | <b>0.003</b>     |
| Pc.Ae.C38.2   | 1.609a (0.574)   | 1.408b (0.596)   | 1.376b (0.648)  | <b>&lt;0.001</b> |
| Pc.Ae.C38.3   | 2.716a (0.896)   | 2.429b (0.84)    | 2.63ab (0.861)  | <b>0.046</b>     |
| Pc.Ae.C38.4   | 7.883 (2.258)    | 7.19 (2.868)     | 7.58 (2.403)    | 0.206            |
| Pc.Ae.C38.5   | 12.97a (4.045)   | 11.236b (3.71)   | 10.78b (3.51)   | <b>&lt;0.001</b> |
| Pc.Ae.C38.6   | 7.707a (3.236)   | 6.549b (2.347)   | 6.41b (3.099)   | <b>&lt;0.001</b> |
| Pc.Ae.C40.1   | 1.354a (0.533)   | 1.116b (0.365)   | 1.147b (0.522)  | <b>0.001</b>     |
| Pc.Ae.C40.2   | 1.484 (0.473)    | 1.335 (0.461)    | 1.42 (0.497)    | 0.054            |
| Pc.Ae.C40.3   | 0.828a (0.211)   | 0.756b (0.21)    | 0.781ab (0.237) | <b>0.020</b>     |
| Pc.Ae.C40.4   | 1.721a (0.525)   | 1.57b (0.562)    | 1.571b (0.509)  | <b>0.001</b>     |
| Pc.Ae.C40.5   | 3.228a (1.193)   | 2.87b (0.928)    | 2.816b (1.189)  | <b>&lt;0.001</b> |
| Pc.Ae.C40.6   | 4.933a (1.869)   | 4.526b (1.73)    | 4.235ab (1.983) | <b>0.025</b>     |
| Pc.Ae.C42.1   | 0.308 (0.09)     | 0.296 (0.103)    | 0.31 (0.096)    | 0.167            |
| Pc.Ae.C42.2   | 0.626a (0.171)   | 0.548b (0.175)   | 0.545b (0.269)  | <b>&lt;0.001</b> |
| Pc.Ae.C42.3   | 0.839a (0.267)   | 0.676b (0.27)    | 0.667b (0.23)   | <b>&lt;0.001</b> |
| Pc.Ae.C42.4   | 0.691a (0.238)   | 0.599b (0.264)   | 0.625ab (0.221) | <b>0.008</b>     |
| Pc.Ae.C42.5   | 1.689a (0.541)   | 1.5b (0.482)     | 1.509b (0.463)  | <b>&lt;0.001</b> |
| Pc.Ae.C44.3   | 0.119 (0.042)    | 0.111 (0.032)    | 0.113 (0.052)   | 0.101            |
| Pc.Ae.C44.4   | 0.34 (0.1)       | 0.305 (0.118)    | 0.319 (0.082)   | 0.101            |
| Pc.Ae.C44.5   | 1.393a (0.598)   | 1.256b (0.638)   | 1.296b (0.491)  | <b>0.002</b>     |
| Pc.Ae.C44.6   | 1.373 (0.554)    | 1.3 (0.509)      | 1.307 (0.458)   | 0.196            |
| Sm..Oh..C14.1 | 3.986 (1.185)    | 3.784 (1.316)    | 3.906 (1.32)    | 0.221            |
| Sm..Oh..C16.1 | 2.449 (0.721)    | 2.383 (0.873)    | 2.46 (0.75)     | 0.493            |
| Sm..Oh..C22.1 | 10.909a (3.106)  | 9.415b (3.425)   | 9.878b (2.474)  | <b>&lt;0.001</b> |
| Sm..Oh..C22.2 | 7.75 (2.391)     | 7.348 (2.55)     | 7.45 (1.611)    | 0.328            |
| Sm..Oh..C24.1 | 1.15a (0.4)      | 1.042b (0.437)   | 1.095ab (0.369) | <b>0.014</b>     |
| Sm.C16.0      | 112.041 (23.037) | 104.721 (29.652) | 107.116 (21.5)  | 0.134            |
| Sm.C16.1      | 15.332 (3.613)   | 14.978 (5.552)   | 15.234 (3.463)  | 0.134            |
| Sm.C18.0      | 20.77a (6.014)   | 18.464b (5.525)  | 18.9b (3.345)   | <b>0.002</b>     |
| Sm.C18.1      | 9.453 (2.825)    | 9.214 (3.259)    | 9.169 (2.59)    | 0.253            |
| Sm.C24.0      | 22.084a (6.556)  | 19.226b (5.428)  | 19.22b (5.918)  | <b>&lt;0.001</b> |

|          |                      |                      |                       |              |
|----------|----------------------|----------------------|-----------------------|--------------|
| Sm.C24.1 | 45.177 (11.802)      | 44.458 (13.729)      | 44.129 (9.832)        | 0.351        |
| Sm.C26.1 | 0.394 (0.186)        | 0.39 (0.188)         | 0.391 (0.175)         | 0.806        |
| H1       | 6554.552a (2667.197) | 7453.156b (3610.018) | 7762.709ab (4574.336) | <b>0.035</b> |

\*: Features are summarized as 'median (interquartile range)'; #: Kruskal-Wallis H test; \*\*: There is a statistically significant difference in the group categories that do not contain the same letter; NDR: non- diabetic retinopathy; NPDR: non-proliferative diabetic retinopathy; PDR: proliferative diabetic retinopathy.
